# Supplementary material for: Outcomes of Endoscopic Retrograde Cholangiopancreatography in End-Stage Renal Disease Patients Undergoing Hemodialysis: A Systematic Review and Pooled Analysis
Source: MDPI journal article supplement (doi:10.3390/jpm12111883), 2022-11-10

**Supplementary Materials, Figure S1:** The frequency of ERCP-related bleeding in HD patients with EST. The size of each square is proportional to the study’s weight. The diamond is the summary estimate. ERCP, endoscopic retrograde cholangiopancreatography; EST, endoscopic sphincterotomy; HD, hemodialysis; CI, confidence interval.

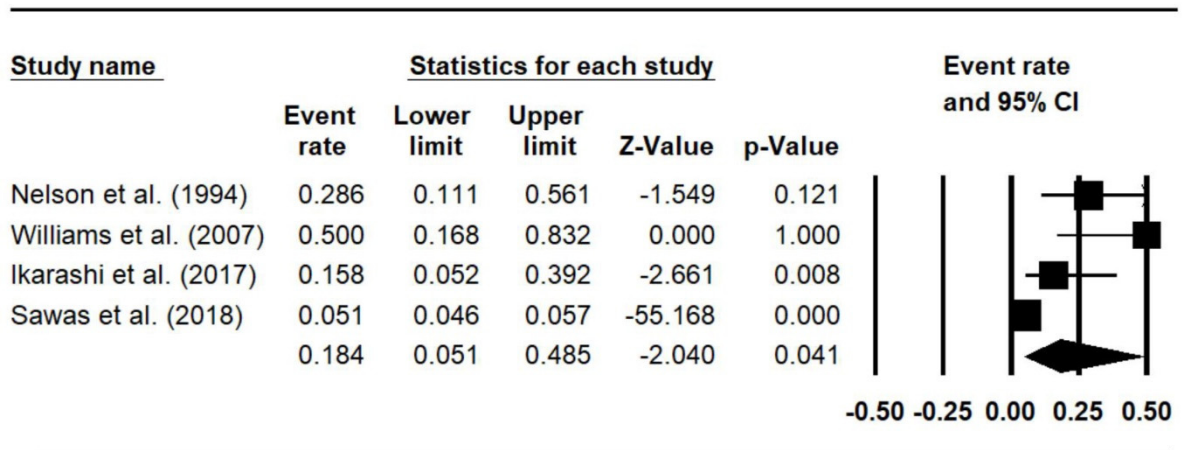

**Supplementary Materials, Figure S2:** The frequency of ERCP-related bleeding in HD patients with EST and/or EPBD. The size of each square is proportional to the study's weight. The diamond is the summary estimate. ERCP, endoscopic retrograde cholangiopancreatography; HD, hemodialysis; EST, endoscopic sphincterotomy; EPBD, endoscopic papillary balloon dilation; CI, confidence interval.

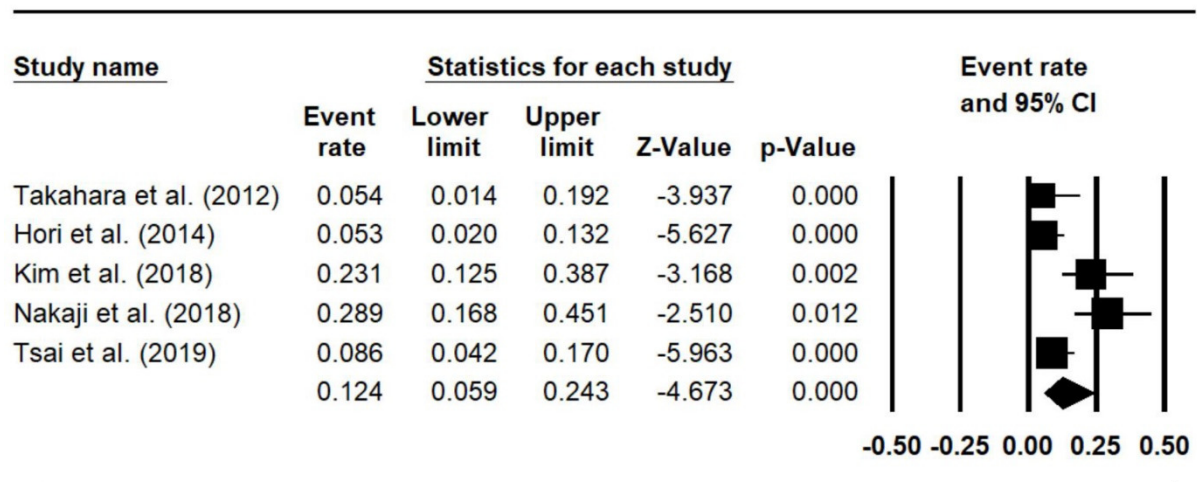

Supplement: s1 [file s1]
